# Supplementary material
Source: PubMed Central journal article supplement (PMC7494051)
Supplement: NIHMS1538652-supplement-1.pdf [file NIHMS1538652-supplement-1.pdf]

## Supplementary information

**Supplementary Table 1. Statistics of all factors from models tested during the Doctor-Patient Interaction phase in Study 1.** Factors highlighted in bold were reported in the result section.

| Phase                      | Doctor or Patient | Dependent variable                            | Factor                 | Random effect | $\beta$                   | t val        | df           | p               |
|----------------------------|-------------------|-----------------------------------------------|------------------------|---------------|---------------------------|--------------|--------------|-----------------|
|                            |                   |                                               |                        |               | F (df1, df2)              |              |              |                 |
| Doctor-Patient Interaction | Doctor            | Belief of effectiveness                       | Time* Condition        |               | F(1, 23.00) = 8.06        |              |              | 0.01            |
|                            |                   |                                               | <b>Condition</b>       | <b>V</b>      | <b>61.92</b>              | <b>11.05</b> | <b>26.54</b> | <b>&lt;.001</b> |
|                            |                   |                                               | Time                   |               | 4.94                      | 2.04         | 43.66        | 0.05            |
|                            |                   | Predicted pain z-score from facial expression | <b>Condition</b>       | <b>V</b>      | <b>-0.10</b>              | <b>-2.43</b> | <b>17.78</b> | <b>0.03</b>     |
|                            |                   |                                               | Trial order            | V             | -0.03                     | -3.49        | 21.63        | 0.002           |
|                            |                   |                                               | Color                  |               | -0.08                     | -2.24        | 23.52        | 0.03            |
|                            |                   |                                               | Site                   |               | F(3, 251.60) = 0.46       |              |              | 0.71            |
|                            | Patient           | Belief of effectiveness                       | <b>Time* Condition</b> |               | <b>F(1, 23.00) = 5.63</b> |              |              | <b>0.03</b>     |
|                            |                   |                                               | Condition              | V             | 3.56                      | 0.64         | 45.01        | 0.53            |
|                            |                   |                                               | Time                   |               | 4.54                      | 0.83         | 45.46        | 0.41            |
|                            |                   | Overall pain rating                           | <b>Condition</b>       | <b>V</b>      | <b>-7.30</b>              | <b>-4.78</b> | <b>22.00</b> | <b>&lt;.001</b> |
|                            |                   |                                               | Trial order            | V             | 0.77                      | 3.09         | 22.80        | 0.01            |
|                            |                   |                                               | Color                  |               | 2.60                      | 1.67         | 22.10        | 0.11            |
|                            |                   |                                               | Site                   |               | F(3, 299.67) = 0.88       |              |              | 0.45            |
|                            |                   | Maximal continuous Pain rating                | <b>Condition</b>       | <b>V</b>      | <b>-11.52</b>             | <b>-5.63</b> | <b>22.00</b> | <b>&lt;.001</b> |
|                            |                   |                                               | Trial order            | V             | 0.70                      | 2.25         | 83.30        | 0.03            |
|                            |                   |                                               | Color                  |               | 3.82                      | 1.89         | 22.10        | 0.07            |
|                            |                   |                                               | Site                   |               | F(3, 299.67) = 1.05       |              |              | 0.37            |

|  |  |                                               |                  |          |                     |              |              |              |
|--|--|-----------------------------------------------|------------------|----------|---------------------|--------------|--------------|--------------|
|  |  | Skin conductance response (AUC)               | <b>Condition</b> | <b>V</b> | <b>-1.67</b>        | <b>-3.20</b> | <b>20.14</b> | <b>.004</b>  |
|  |  |                                               | Trial order      | V        | -0.26               | -4.59        | 60.05        | <.001        |
|  |  |                                               | Color            |          | -0.20               | -0.59        | 76.17        | 0.56         |
|  |  |                                               | Site             |          | F(3, 308.80) = 0.51 |              |              | 0.68         |
|  |  | Predicted pain z-score from facial expression | <b>Condition</b> | <b>V</b> | <b>-0.14</b>        | <b>-2.86</b> | <b>17.02</b> | <b>0.01</b>  |
|  |  |                                               | Trial order      | V        | -0.02               | -2.67        | 17.91        | 0.02         |
|  |  |                                               | Color            |          | 0.01                | 0.13         | 17.00        | 0.90         |
|  |  |                                               | Site             |          | F(3, 246.29) = 0.31 |              |              | 0.82         |
|  |  | Doctor's perceived empathy                    | Time* Condition  |          | F(1, 23.00) = 0.07  |              |              | 0.79         |
|  |  |                                               | <b>Condition</b> | <b>V</b> | <b>9.61</b>         | <b>2.86</b>  | <b>33.67</b> | <b>0.007</b> |
|  |  |                                               | Time             |          | -1.59               | -0.56        | 38.23        | 0.58         |

**Supplementary Table 2. Coefficients for the pain expression model.**

| Features    | Coefs | Features   | Coefs  | Features    | Coefs  |
|-------------|-------|------------|--------|-------------|--------|
| s_tmaxAU4   | 0.040 | s_max_Yaw  | 0.010  | s_tmaxAU18  | -0.005 |
| s_min_AU12  | 0.037 | s_min_Yaw  | 0.010  | s_min_AU24  | -0.006 |
| s_min_Pitch | 0.035 | s_tmaxAU2  | 0.010  | s_tmaxAU24  | -0.008 |
| s_max_AU1   | 0.032 | s_tmaxAU20 | 0.009  | s_max_AU17  | -0.009 |
| s_max_AU2   | 0.029 | s_tmaxAU14 | 0.008  | s_tmaxAU6   | -0.010 |
| s_max_AU10  | 0.028 | s_min_AU20 | 0.007  | s_min_AU5   | -0.010 |
| s_max_AU9   | 0.027 | s_tmaxAU43 | 0.007  | s_min_AU23  | -0.011 |
| s_tmaxAU28  | 0.026 | s_min_AU26 | 0.005  | s_tmaxAU9   | -0.014 |
| s_max_AU24  | 0.025 | s_tmaxRoll | 0.005  | s_tmaxAU7   | -0.016 |
| s_tmaxAU10  | 0.025 | s_max_AU43 | 0.004  | s_min_AU2   | -0.018 |
| s_max_AU20  | 0.025 | s_min_AU28 | 0.004  | s_tmaxAU23  | -0.018 |
| s_max_AU28  | 0.024 | s_min_AU7  | 0.003  | s_max_AU18  | -0.019 |
| s_max_AU12  | 0.023 | s_min_AU6  | 0.002  | s_tmaxAU15  | -0.023 |
| s_tmaxAU12  | 0.023 | s_min_Roll | 0.001  | s_min_AU9   | -0.026 |
| s_max_Pitch | 0.022 | s_tmaxAU1  | 0.001  | s_max_AU5   | -0.027 |
| s_max_AU14  | 0.018 | s_min_AU43 | 0.000  | s_min_AU15  | -0.030 |
| s_tmaxAU25  | 0.018 | s_min_AU10 | 0.000  | s_tmaxPitch | -0.033 |
| s_min_AU14  | 0.016 | s_min_AU25 | 0.000  | s_min_AU18  | -0.038 |
| s_max_AU4   | 0.015 | s_max_AU23 | 0.000  | s_min_AU17  | -0.040 |
| s_tmaxAU26  | 0.015 | s_max_AU7  | -0.002 | s_tmaxYaw   | -0.048 |
| s_max_AU6   | 0.014 | s_min_AU1  | -0.003 | s_min_AU4   | -0.048 |
| s_max_AU25  | 0.013 | s_max_Roll | -0.004 | s_max_AU15  | -0.048 |
| s_tmaxAU17  | 0.012 | s_max_AU26 | -0.005 | s_tmaxAU5   | -0.055 |

**Supplementary Table 3. Statistics of all factors from models tested during the Doctor-Patient Interaction phase in Study 2.** Factors highlighted in bold were reported in the result section.

| Phase                      | Doctor or Patient | Dependent variable      | Factor                       | Random effect               | $\beta$            | t val                      | df           | p               |              |
|----------------------------|-------------------|-------------------------|------------------------------|-----------------------------|--------------------|----------------------------|--------------|-----------------|--------------|
|                            |                   |                         |                              |                             | F (df1, df2)       |                            |              |                 |              |
| Doctor-Patient Interaction | Doctor            | Belief of effectiveness | Time*<br>Condition*<br>Order |                             | F(1, 41.00) = 0.71 |                            |              | 0.41            |              |
|                            |                   |                         | Condition*<br>Order          |                             | F(1, 41.00) = 1.37 |                            |              | 0.25            |              |
|                            |                   |                         | Time*<br>Order               |                             | F(1, 41.00) = 0    |                            |              | 0.99            |              |
|                            |                   |                         | Time*<br>Condition           |                             | F(1, 41.00) = 0.56 |                            |              | 0.46            |              |
|                            |                   |                         | <b>Condition</b>             | <b>V</b>                    | <b>47.00</b>       | <b>7.10</b>                | <b>54.09</b> | <b>&lt;.001</b> |              |
|                            |                   |                         | Time                         | V                           | 0.65               | 0.16                       | 77.57        | 0.87            |              |
|                            |                   |                         | Order                        |                             | -3.61              | -0.50                      | 44.86        | 0.62            |              |
|                            |                   |                         | Experimenter                 |                             | 2.19               | 0.39                       | 39.00        | 0.70            |              |
|                            |                   |                         | Temperature                  |                             | -1.12              | -0.19                      | 39.00        | 0.85            |              |
|                            |                   |                         | Overall pain rating          | <b>Order*<br/>Condition</b> |                    | <b>F(1, 38.10) = 12.34</b> |              |                 | <b>0.001</b> |
|                            |                   |                         |                              | Experimenter*<br>Condition  |                    | F(1, 38.13) = 1.60         |              |                 | 0.21         |
|                            |                   |                         |                              | Temperature*<br>Condition   |                    | F(1, 38.08) = 0.41         |              |                 | 0.52         |
|                            |                   |                         |                              | Condition                   | V                  | 3.19                       | 1.13         | 38.40           | 0.26         |
|                            |                   |                         |                              | Order                       |                    | -1.84                      | -0.42        | 39.20           | 0.67         |

|  |                                 |                         |                               |                             |                           |              |                 |              |
|--|---------------------------------|-------------------------|-------------------------------|-----------------------------|---------------------------|--------------|-----------------|--------------|
|  | Patient                         |                         | Trial order                   | V                           | 0.70                      | 1.92         | 41.80           | 0.06         |
|  |                                 |                         | Color                         |                             | 0.52                      | 0.39         | 38.00           | 0.70         |
|  |                                 |                         | <b>Experimenter</b>           |                             | <b>-6.67</b>              | <b>-1.37</b> | <b>39.20</b>    | <b>0.18</b>  |
|  |                                 |                         | <b>Temperature</b>            |                             | <b>13.36</b>              | <b>2.65</b>  | <b>39.10</b>    | <b>0.01</b>  |
|  |                                 |                         | Site                          |                             | F(3, 587.63) = 1.27       |              |                 | 0.28         |
|  |                                 | Belief of effectiveness | <b>Time* Condition* Order</b> |                             | <b>F(1, 81.58) = 9.99</b> |              |                 | <b>0.002</b> |
|  |                                 |                         | Condition* Order              |                             | F(1, 66.51) = 4.59        |              |                 | 0.04         |
|  |                                 |                         | Time* Order                   |                             | F(1, 41.03) = 0.31        |              |                 | 0.58         |
|  |                                 |                         | Time* Condition               |                             | F(1, 81.58) = 1.91        |              |                 | 0.17         |
|  |                                 |                         | Time                          | V                           | 10.09                     | 1.25         | 79.90           | 0.21         |
|  | Condition                       |                         | V                             | 2.12                        | 0.32                      | 82.66        | 0.75            |              |
|  | Order                           |                         |                               | 6.71                        | 0.97                      | 61.13        | 0.33            |              |
|  | Experimenter                    |                         |                               | -4.43                       | -0.86                     | 39.80        | 0.39            |              |
|  | Temperature                     |                         |                               | 7.73                        | 1.46                      | 39.80        | 0.15            |              |
|  | Skin conductance response (AUC) | <b>Order* Condition</b> |                               | <b>F(1, 398.55) = 11.00</b> |                           |              | <b>&lt;.001</b> |              |
|  |                                 | Condition               | V                             | 0.53                        | 1.85                      | 375.9        | 0.06            |              |
|  |                                 | Order                   |                               | 0.78                        | 2.16                      | 38.90        | 0.04            |              |
|  |                                 | Trial order             | V                             | -0.34                       | -4.66                     | 29.30        | <.001           |              |

|  |  |                                  |                              |   |                           |       |       |             |
|--|--|----------------------------------|------------------------------|---|---------------------------|-------|-------|-------------|
|  |  |                                  | Color                        |   | -0.21                     | -0.99 | 402.9 | 0.33        |
|  |  |                                  | Experimenter                 |   | -0.91                     | -2.51 | 26.00 | 0.02        |
|  |  |                                  | Temperature                  |   | 0.75                      | 1.99  | 26.00 | 0.06        |
|  |  |                                  | Site                         |   | F(3, 442.14) = 0.85       |       |       | 0.47        |
|  |  | Doctor's<br>perceived<br>empathy | Time*<br>Condition*<br>Order |   | F(1, 81.90) = 0.02        |       |       | 0.88        |
|  |  |                                  | <b>Condition*<br/>Order</b>  |   | <b>F(1, 42.48) = 0.43</b> |       |       | <b>0.51</b> |
|  |  |                                  | Time*<br>Order               |   | F(1, 52.40) = 0.28        |       |       | 0.60        |
|  |  |                                  | Time*<br>Condition           |   | F(1, 81.90) = 4.43        |       |       | 0.04        |
|  |  |                                  | <b>Condition</b>             | V | 15.15                     | 2.67  | 84.76 | 0.009       |
|  |  |                                  | Order                        |   | 3.08                      | 0.38  | 47.61 | 0.70        |
|  |  |                                  | Time                         | V | 5.42                      | 1.04  | 84.21 | 0.30        |
|  |  |                                  | Experimenter                 |   | -2.58                     | -0.58 | 39.02 | 0.73        |
|  |  |                                  | Temperature                  |   | 4.44                      | 0.58  | 39.02 | 0.56        |

**Supplementary Table 4. Statistics of all factors from models tested during the Doctor-Patient Interaction phase in Study 3.** Factors highlighted in bold were reported in the result section.

| Phase                      | Doctor or Patient               | Dependent variable      | Factor                 | Random effect | $\beta$                    | t val         | df           | p               |
|----------------------------|---------------------------------|-------------------------|------------------------|---------------|----------------------------|---------------|--------------|-----------------|
|                            |                                 |                         |                        |               | F (df1, df2)               |               |              |                 |
| Doctor-Patient Interaction | Doctor                          | Belief of effectiveness | Time* Condition        |               | F(1, 178.00) = 2.22        |               |              | 0.14            |
|                            |                                 |                         | Time                   | V             | 1.12                       | 0.68          | 159.56       | 0.50            |
|                            |                                 |                         | <b>Condition</b>       | <b>V</b>      | <b>62.57</b>               | <b>18.57</b>  | <b>37.18</b> | <b>&lt;.001</b> |
|                            | Patient                         | Overall pain rating     | <b>Condition</b>       | <b>V</b>      | <b>-3.70</b>               | <b>-2.42</b>  | <b>27.30</b> | <b>0.02</b>     |
|                            |                                 |                         | Color                  |               | 0.89                       | 0.59          | 28.00        | 0.56            |
|                            |                                 |                         | Trial order            | V             | 2.62                       | 7.48          | 29.00        | <.001           |
|                            |                                 |                         | Site                   |               | F(3, 879.20) = 1.58        |               |              | 0.19            |
|                            |                                 | Belief of effectiveness | <b>Time* Condition</b> |               | <b>F(1, 178.00) = 4.98</b> |               |              | <b>0.03</b>     |
|                            |                                 |                         | Condition              | V             | 5.63                       | 1.39          | 61.15        | 0.17            |
|                            |                                 |                         | Time                   |               | 2.20                       | 0.68          | 178.00       | 0.50            |
|                            | Skin conductance response (AUC) | <b>Condition</b>        | <b>V</b>               | <b>-1.37</b>  | <b>-2.04</b>               | <b>285.60</b> | <b>0.04</b>  |                 |
|                            |                                 | Color                   |                        | -1.03         | -1.54                      | 474.30        | 0.12         |                 |
|                            |                                 | Trial order             | V                      | 0.29          | 1.81                       | 52.30         | 0.08         |                 |
|                            |                                 | Time                    | V                      | 0.15          | 4.28                       | 297.90        | <.001        |                 |
|                            | Site                            |                         | F(3, 734.94.00) = 0.41 |               |                            | 0.75          |              |                 |

|  |  |                                  |                    |          |                     |             |              |             |
|--|--|----------------------------------|--------------------|----------|---------------------|-------------|--------------|-------------|
|  |  | Doctor's<br>perceived<br>empathy | Time*<br>Condition |          | F(1, 178.00) = 2.15 |             |              | 0.14        |
|  |  |                                  | <b>Condition</b>   | <b>V</b> | <b>6.88</b>         | <b>2.38</b> | <b>96.03</b> | <b>0.02</b> |
|  |  |                                  | Time               |          | 6.37                | 2.23        | 178.00       | 0.03        |
